# Supplementary material for: SafeFit Trial: virtual clinics to deliver a multimodal intervention to improve psychological and physical well-being in people with cancer. Protocol of a COVID-19 targeted non-randomised phase III trial
Source: HighWire-hosted journal article supplement (doi:10.1136/bmjopen-2020-048175), 2021-08-01
Supplement: bmjopen-2020-048175supp001_data_supplement.pdf [file bmjopen-2020-048175supp001_data_supplement.pdf]

## Appendix A: Behaviour change techniques (BCT) coded to the BCT taxonomy (BCTT V1)

| BCT label                                      | BCT no. (BCTT v1) | Example Intervention component                                                                                                                                                                                                                                                           |
|------------------------------------------------|-------------------|------------------------------------------------------------------------------------------------------------------------------------------------------------------------------------------------------------------------------------------------------------------------------------------|
| Goal setting (behaviour)                       | 1.1               | Participants agree with the CES a goal for a specified period of time, for example walking for 30 minutes twice in the next week                                                                                                                                                         |
| Problem solving                                | 1.2               | CES use the SMARTER goal setting sheets to prompt the participant to analyse factors that might get in the way of them achieving a goal and how it can be overcome. For example, if it is raining the participant could perform an online exercise session rather than exercise outside. |
| Action planning                                | 1.4               | CES use SMARTER goal setting sheets to prompt detailed specification of goals include day of the week and time that they will perform a particular behaviour, for example <i>I will have meat free dinners on Monday, Wednesday and Friday</i>                                           |
| Review behaviour goal(s)                       | 1.5               | During each 1-to-1 session the CES reviews behaviour goal(s) with the participants and modifies them collaboratively as necessary, e.g. setting an easier goal if the previous goal was not achievable.                                                                                  |
| Discrepancy between current behaviour and goal | 1.6               | When reviewing dietary behaviour, the CES and participant will compare current diet with the WCRF guidelines and identify areas for improvement                                                                                                                                          |
| Feedback on behaviour                          | 2.2               | The CES and participant will reflect and discuss changes to behaviour made during the course of the intervention                                                                                                                                                                         |
| Self-monitoring of behaviour                   | 2.3               | Participants have an activity diary which they are encouraged to complete throughout the intervention, noting goals set and whether they were achieved                                                                                                                                   |
| Social support (unspecified)                   | 3.1               | The CES provides praise when participants perform a planned behaviour                                                                                                                                                                                                                    |
| Social support (practical)                     | 3.2               | The CES provides practical support to perform a behaviour, for example providing a live exercise class during the 1-to-1 consultations.                                                                                                                                                  |
| Social support (emotional)                     | 3.3               | The CES provides emotional support throughout the intervention and encourages the participant to seek that from others in their social network for continuation of support if necessary/appropriate.                                                                                     |
| Instruction on how to perform a behaviour      | 4.1               | The CES may for example demonstrate specific exercises live during 1-to-1 video conferencing sessions                                                                                                                                                                                    |
| Demonstration of the behaviour                 | 6.1               | The CES may provide links to online videos of specific resistance exercises for example for participants to use independently                                                                                                                                                            |
| Behavioural practice/rehearsal                 | 8.1               | The participant may choose to use a relaxation app before bed each evening if they have difficulties with sleep and/or anxiety                                                                                                                                                           |

|                                    |      |                                                                                                                                                                                                                   |
|------------------------------------|------|-------------------------------------------------------------------------------------------------------------------------------------------------------------------------------------------------------------------|
| Habit formation                    | 8.3  | The participant may plan to eat fruit every morning with breakfast to increase fruit and fibre intake.                                                                                                            |
| Graded tasks                       | 8.7  | The CES works with the participant to start with easy to achieve goals, such as walking for 10 minutes 3 times a week, gradually increasing the difficulty overtime                                               |
| Credible source                    | 9.1  | The CES presents as a credible source with in-depth understanding of the benefits of the intervention components which are discussed with the participant                                                         |
| Verbal persuasion about capability | 15.1 | If the participants express self-doubt about achieving a behaviour the CES will encourage the participant that they are capable of doing so, such as performing resistance exercises if a participant has a stoma |
| Focus on past success              | 15.3 | The CES will regularly review with the participant the improvements they have made over the course of the intervention                                                                                            |
